# Supplementary material for: GIS-based spatial modelling of COVID-19 death incidence in São Paulo, Brazil
Source: PubMed Central journal article supplement (PMC7557234; doi:10.1177/0956247820963962), 2021-04
Supplement: urban-supplement_1.pdf [file urban-supplement_1.pdf]

**GIS-based spatial modelling of COVID-19 death incidence in São Paulo, Brazil**

**Online supplementary information**

MAP S1  
Districts of the city of São Paulo

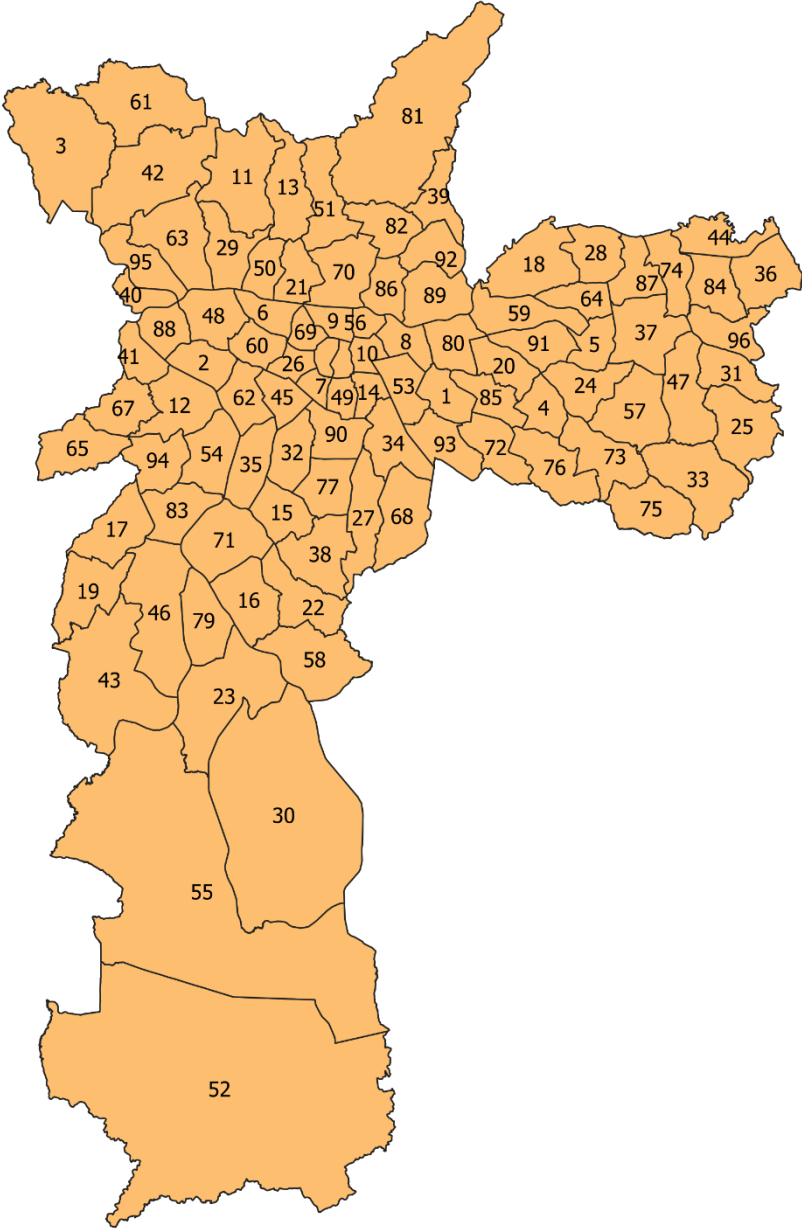

TABLE S1

Summary characteristics of the districts of the city of São Paulo and COVID-19 deaths (confirmed and suspected), as of 18 June 2020

| Code | District           | Population | COVID-19 deaths | Deaths per 1,000 people |
|------|--------------------|------------|-----------------|-------------------------|
| 1    | Água Rasa          | 82,564     | 111             | 1.20                    |
| 2    | Alto de Pinheiros  | 40,962     | 44              | 0.94                    |
| 3    | Ananguera          | 84,719     | 36              | 0.50                    |
| 4    | Aricanduva         | 85,868     | 91              | 0.93                    |
| 5    | Artur Alvim        | 100,462    | 139             | 1.21                    |
| 6    | Barra Funda        | 16,115     | 19              | 1.21                    |
| 7    | Bela Vista         | 73,235     | 37              | 0.49                    |
| 8    | Belém              | 49,213     | 69              | 1.41                    |
| 9    | Bom Retiro         | 38,877     | 37              | 1.00                    |
| 10   | Brás               | 33,045     | 45              | 1.41                    |
| 11   | Brasilândia        | 281,977    | 277             | 0.96                    |
| 12   | Butanta            | 53,836     | 41              | 0.69                    |
| 13   | Cachoeirinha       | 146,387    | 178             | 1.14                    |
| 14   | Cambuci            | 40,667     | 44              | 1.09                    |
| 15   | Campo Belo         | 63,744     | 85              | 1.19                    |
| 16   | Campo Grande       | 106,722    | 88              | 0.80                    |
| 17   | Campo Limpo        | 228,893    | 144             | 0.63                    |
| 18   | Cangaíba           | 138,107    | 153             | 1.03                    |
| 19   | Capao Redondo      | 296,378    | 237             | 0.81                    |
| 20   | Carrao             | 84,925     | 94              | 1.04                    |
| 21   | Casa Verde         | 86,004     | 108             | 1.16                    |
| 22   | Cidade Ademar      | 285,677    | 225             | 0.77                    |
| 23   | Cidade Dutra       | 203,131    | 159             | 0.74                    |
| 24   | Cidade Líder       | 135,247    | 126             | 0.91                    |
| 25   | Cidade Tiradentes  | 235,630    | 193             | 0.84                    |
| 26   | Consolacao         | 57,405     | 52              | 0.83                    |
| 27   | Cursino            | 113,728    | 117             | 0.99                    |
| 28   | Ermelino Matarazzo | 118,715    | 106             | 0.86                    |
| 29   | Freguesia do O     | 140,083    | 181             | 1.17                    |
| 30   | Grajau             | 390,096    | 267             | 0.68                    |
| 31   | Guaianases         | 109,730    | 124             | 0.69                    |
| 32   | Iguatemi           | 149,739    | 137             | 0.99                    |
| 33   | Ipiranga           | 112,222    | 115             | 0.99                    |
| 34   | Itaim Bibi         | 97,229     | 90              | 0.89                    |
| 35   | Itaim Paulista     | 234,912    | 173             | 0.71                    |
| 36   | Itaquera           | 211,555    | 187             | 0.84                    |
| 37   | Jabaquara          | 229,346    | 199             | 0.82                    |
| 38   | Jaçanã             | 96,054     | 84              | 0.82                    |
| 39   | Jaguara            | 23,950     | 19              | 0.70                    |
| 40   | Jaguapé            | 55,192     | 46              | 0.85                    |
| 41   | Jaraguá            | 212,819    | 142             | 0.71                    |
| 42   | Jardim Ângela      | 338,265    | 240             | 0.75                    |
| 43   | Jardim Helena      | 135,605    | 149             | 1.01                    |
| 44   | Jardim Paulista    | 90,719     | 64              | 0.66                    |
| 45   | Jardim São Luís    | 293,660    | 235             | 0.81                    |

|    |                 |         |     |      |
|----|-----------------|---------|-----|------|
| 46 | José Bonifácio  | 136,560 | 117 | 0.87 |
| 47 | Lajeado         | 174,539 | 161 | 1.42 |
| 48 | Lapa            | 67,170  | 62  | 0.87 |
| 49 | Liberdade       | 72,797  | 73  | 0.97 |
| 50 | Limão           | 79,657  | 115 | 1.32 |
| 51 | Mandaqui        | 109,228 | 116 | 0.99 |
| 52 | Marsilac        | 8,426   | 9   | 1.00 |
| 53 | Moema           | 89,382  | 66  | 0.73 |
| 54 | Moóca           | 80,330  | 91  | 1.10 |
| 55 | Morumbi         | 52,921  | 38  | 0.74 |
| 56 | Parelheiros     | 153,598 | 113 | 0.79 |
| 57 | Pari            | 19,069  | 27  | 1.43 |
| 58 | Parque do Carmo | 71,749  | 69  | 0.93 |
| 59 | Pedreira        | 160,976 | 92  | 0.59 |
| 60 | Penha           | 129,100 | 128 | 0.92 |
| 61 | Perdizes        | 114,788 | 87  | 0.72 |
| 62 | Perus           | 89,310  | 76  | 0.87 |
| 63 | Pinheiros       | 65,909  | 53  | 0.74 |
| 64 | Pirituba        | 171,232 | 149 | 0.81 |
| 65 | Ponte Rasa      | 89,774  | 102 | 1.00 |
| 66 | Raposo Tavares  | 107,426 | 88  | 0.81 |
| 67 | República       | 61,832  | 64  | 1.03 |
| 68 | Rio Pequeno     | 123,711 | 98  | 0.76 |
| 69 | Sacomã          | 263,621 | 226 | 0.84 |
| 70 | Santa Cecília   | 88,518  | 91  | 1.00 |
| 71 | Santana         | 113,253 | 128 | 0.99 |
| 72 | Santo Amaro     | 74,447  | 81  | 1.04 |
| 73 | São Domingos    | 86,403  | 85  | 0.92 |
| 74 | São Lucas       | 142,948 | 146 | 0.94 |
| 75 | São Mateus      | 155,387 | 168 | 0.99 |
| 76 | São Miguel      | 89,173  | 112 | 1.12 |
| 77 | São Rafael      | 159,683 | 95  | 0.61 |
| 78 | Sapopemba       | 289,759 | 300 | 0.97 |
| 79 | Saúde           | 134,147 | 112 | 0.79 |
| 80 | Sé              | 26,693  | 25  | 0.97 |
| 81 | Socorro         | 36,033  | 33  | 0.80 |
| 82 | Tatuapé         | 96,045  | 100 | 1.00 |
| 83 | Tremembé        | 223,553 | 218 | 1.02 |
| 84 | Tucuruvi        | 96,358  | 94  | 0.88 |
| 85 | Vila Andrade    | 163,508 | 86  | 0.62 |
| 86 | Vila Curuçá     | 153,500 | 141 | 0.87 |
| 87 | Vila Formosa    | 94,100  | 106 | 1.03 |
| 88 | Vila Guilherme  | 57,079  | 64  | 1.08 |
| 89 | Vila Jacuí      | 145,836 | 138 | 0.89 |
| 90 | Vila Leopoldina | 45,092  | 27  | 0.63 |
| 91 | Vila Maria      | 114,025 | 111 | 0.90 |
| 92 | Vila Mariana    | 132,226 | 112 | 0.79 |
| 93 | Vila Matilde    | 105,575 | 112 | 0.98 |
| 94 | Vila Medeiros   | 123,456 | 153 | 1.08 |
| 95 | Vila Prudente   | 104,686 | 121 | 1.07 |

SOURCE: SEADE (2020), IMP, accessed 18 June 2020 at <https://www.imp.seade.gov.br>.

TABLE S2

Summary statistics of the OLS model for selected variables in modelling COVID-19 deaths in the city of São Paulo

| Variable                     | Coefficient | Std. Error | T-statistic | P-value |
|------------------------------|-------------|------------|-------------|---------|
| Intercept                    | -212.49700  | 53.32850   | -3.98467    | 0.00014 |
| Population aged 60+          | 0.0051528   | 0.000298   | 17.29070    | 0.00000 |
| Average people per household | 85.1767     | 9.24437    | 9.21391     | 0.00000 |
| Population density           | 0.0018544   | 0.0005156  | 3.59679     | 0.00052 |
| MHDI                         | -50.4409    | 48.8182    | -1.03324    | 0.30423 |

Table S3

Summary statistics of SLM and SEM in modelling COVID-19 deaths in the city of São Paulo

| Variable                 | Coefficient |         | Std. error |         | Z-score |         | P-value |        |
|--------------------------|-------------|---------|------------|---------|---------|---------|---------|--------|
|                          | SLM         | SEM     | SLM        | SEM     | SLM     | SEM     | SLM     | SEM    |
| Intercept                | -           | -       | 52.0743    | 53.3810 | -3.8771 | -3.9237 | 0.0001  | 0.0001 |
| Pop_60+                  | 0.0050      | 0.0053  | 0.0003     | 0.0003  | 15.7863 | 17.0281 | 0.0000  | 0.0000 |
| Average people/household | 78.0022     | 80.3288 | 10.2299    | 10.5741 | 7.6249  | 7.5968  | 0.0000  | 0.0000 |
| Population density       | 0.0018      | 0.0014  | 0.0005     | 0.0006  | 3.6384  | 2.5619  | 0.0003  | 0.0104 |
| MHDI                     | -           | -       | 47.0889    | 46.3686 | -1.0181 | -0.7335 | 0.3087  | 0.4633 |
| Rho                      | 0.0994      | -       | 0.0763     | -       | 1.3024  | -       | 0.1928  | -      |
| Lambda                   | -           | 0.2880  | -          | 0.1348  | -       | 2.1362  | -       | 0.0327 |
